# Supplementary material for: InsP3 receptors and Orai channels in pancreatic acinar cells: co-localization and its consequences
Source: PubMed Central journal article supplement — Biochem J. 2011 May 13;436(Pt 2):231–9. doi: 10.1042/BJ20110083 (PMC3262233; doi:10.1042/bj20110083), 2011-05-13
Supplement: bj4360231add.pdf [file bj4360231add.pdf]

**SUPPLEMENTARY ONLINE DATA**

**InsP<sub>3</sub> receptors and Orai channels in pancreatic acinar cells: co-localization and its consequences**

Gyorgy LUR\*, Mark W. SHERWOOD†, Etsuko EBISUI†, Lee HAYNES\*, Stefan FESKE‡, Robert SUTTON§, Robert D. BURGOYNE\*, Katsuhiko MIKOSHIBA†, Ole H. PETERSEN|| and Alexei V. TEPIKIN\*<sup>1</sup>

\*Department of Cellular and Molecular Physiology, The University of Liverpool, Crown Street, Liverpool L69 3BX, U.K., †Laboratory for Developmental Neurobiology, RIKEN Brain Science Institute, 2-1 Hirosawa, Wako City, Saitama, 351-0198 Japan, ‡NYU Langone Medical Center, 550 First Avenue, SRB 316, New York, NY 10016, U.S.A., §Liverpool NIHR Pancreas Biomedical Research Unit, The University of Liverpool, Crown Street, Liverpool L69 3BX, U.K., and ||MRC Group, School of Biosciences, Cardiff University, Museum Avenue, Cardiff CF10 3AX, Wales, U.K.

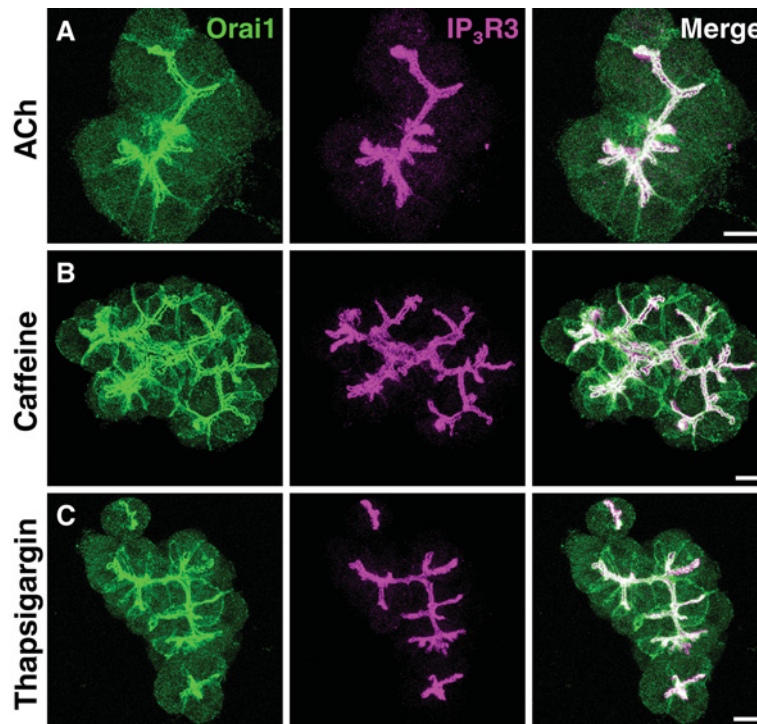

**Figure S1 Orai1 and IP<sub>3</sub>R3 staining in acinar cells following various stimuli**

All images show maximum projections of confocal optical slices from pancreatic acinar cell clusters. The distribution of Orai1 (green) in pancreatic acinar cells in the presence of (A) ACh (300 nM, *n* = 3), (B) caffeine (10 mM, *n* = 3) and (C) TG (2 μM, *n* = 3). In the apical pole, Orai1 was co-localized with type 3 IP<sub>3</sub>Rs (magenta) in every condition. Note that we have not observed clearance of Orai1 or IP<sub>3</sub>R3 from the apical region following the ACh stimulation, which should trigger significant exocytosis of zymogen granules and therefore additional membrane turnover in the apical region of the cells. The distribution of Orai1 and IP<sub>3</sub>R3 was similar to that in control (unstimulated) cells. Some lateral and basal Orai1 was observed (A–C right panels, green colour on the merged images). Scale bars correspond to 10 μm.

<sup>1</sup> To whom correspondence should be addressed (email a.tepikin@liv.ac.uk).

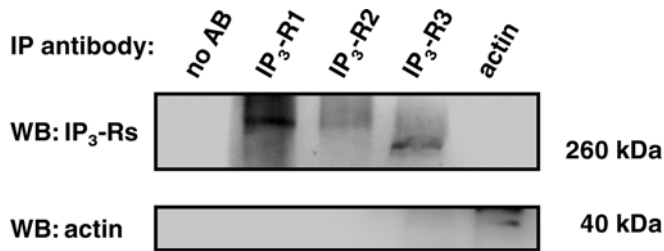

**Figure S2** IP<sub>3</sub>Rs do not co-immunoprecipitate actin from pancreatic acinar cells

Western blots show immunoprecipitates from pancreatic acinar cell lysates. Protein G–Sepharose beads without antibodies (no AB) do not precipitate significant amounts of protein from acinar cell lysates (lane 1). Antibodies against all three subtypes of IP<sub>3</sub>Rs precipitate the corresponding IP<sub>3</sub>R (lanes 2–4, upper panel) but not actin (same lanes on the lower panel), while an anti-actin antibody precipitates actin from the lysate but none of the three IP<sub>3</sub>Rs (lane 5). Hence it is unlikely that the observed IP<sub>3</sub>R–Orai1 co-immunoprecipitation (reported in the main paper and illustrated in Figure 1 of the main paper) is mediated by actin.

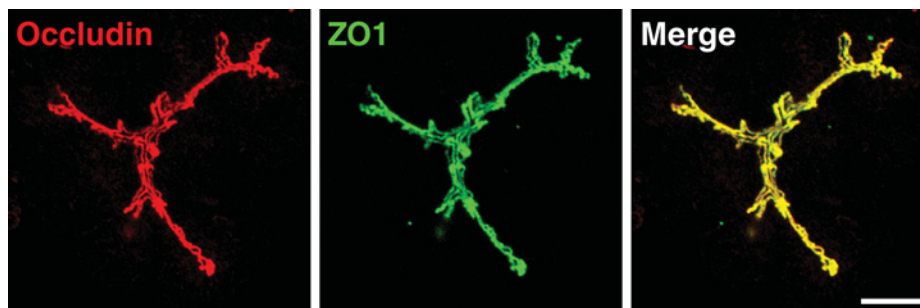

**Figure S3** Occludin and ZO1 co-localize in pancreatic acinar cells

Antibodies against occludin or ZO1 were used (see Figure 3 and accompanying text in the main paper) to probe the localization of tight junctions and to define the apical membrane regions of the cells. Anti-ZO1 antibody [1] was a gift from Dr M. Furuse from Kobe University. The images demonstrate the co-localization of the two proteins ( $n = 4$ ) which both can therefore be used to label tight junctions. Scale bar corresponds to 10  $\mu\text{m}$ .

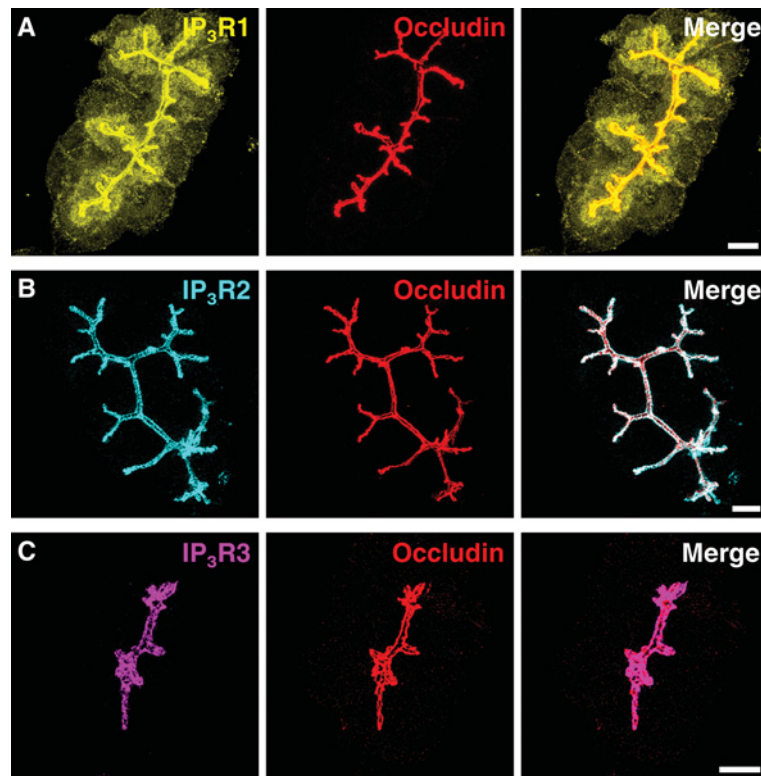

**Figure S4 Apically localized  $\text{IP}_3$ Rs co-localize with tight junction marker occludin**

Images show the maximum projections of optical sections from pancreatic acinar cell clusters. IP<sub>3</sub>R1 (yellow, **A**), IP<sub>3</sub>R2 (cyan, **B**) and IP<sub>3</sub>R3 (magenta, **C**) co-localize with occludin (red, central panels) in the apex of acinar cells ( $n = 3, 4$  and  $3$  respectively). Merged images are shown in the right-hand panels. Scale bars correspond to 10  $\mu\text{m}$ .

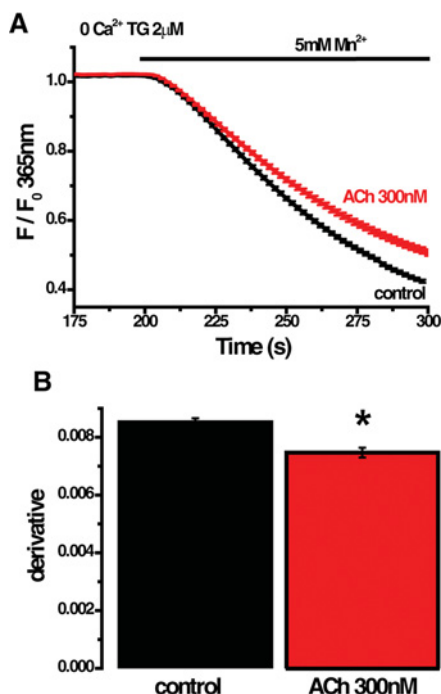

**Figure S5 Effect of ACh on  $Mn^{2+}$  influx in pancreatic acinar cells**

(A) Intracellular  $Ca^{2+}$  stores of fura 2-loaded acinar cells were depleted by a 15 min pre-incubation with nominally  $Ca^{2+}$ -free extracellular solution containing  $2 \mu M$  TG. To assess the effect of ACh on  $Mn^{2+}$  entry, store-depleted cells were treated for an additional 5 min with  $Ca^{2+}$ -free extracellular solution containing  $2 \mu M$  TG (control, black trace,  $n = 139$ ) or  $2 \mu M$  TG and  $300 nM$  ACh (red trace,  $n = 145$ ). Subsequently  $5 mM$   $Mn^{2+}$  was added to the solutions. (A) Shows average traces  $\pm$  S.E.M. (B) Quantification (averaged maximal amplitude of the derivatives of individual traces) of  $Mn^{2+}$  quench in control (black bar) and in ACh ( $300 nM$ , red bar)-treated acinar cells. The rate of fura 2 quench was measured by differentiating the declining part (caused by the addition of  $5 mM$   $Mn^{2+}$ ) of the curve and determining the maximal amplitude of the derivative.

## REFERENCES

- 1 Itoh, M., Yonemura, S., Nagafuchi, A., Tsukita, S. and Tsukita, S. (1991) A 220-kD undercoat-constitutive protein: its specific localization at cadherin-based cell-cell adhesion sites. *J. Cell Biol.* **115**, 1449–1462
- 2 Toescu, E. C., O'Neill, S. C., Petersen, O. H. and Eisner, D. A. (1992) Caffeine inhibits the agonist-evoked cytosolic  $Ca^{2+}$  signal in mouse pancreatic acinar cells by blocking inositol trisphosphate production. *J. Biol. Chem.* **267**, 23467–23470
- 3 Wakui, M., Osipchuk, Y. V. and Petersen, O. H. (1990) Receptor-activated cytoplasmic  $Ca^{2+}$  spiking mediated by inositol trisphosphate is due to  $Ca^{2+}$ -induced  $Ca^{2+}$  release. *Cell* **63**, 1025–1032

Received 13 January 2011/1 March 2011; accepted 3 March 2011

Published as BJ Immediate Publication 3 March 2011, doi:10.1042/BJ20110083

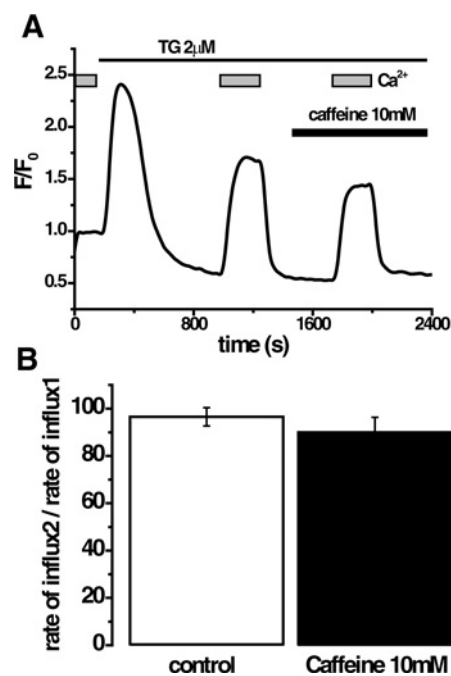

**Figure S6 Inhibition of  $IP_3$ R<sub>s</sub> by caffeine does not affect the rate of SOCE in acinar cells**

Fluo-4 was used as the cytosolic  $Ca^{2+}$  indicator in experiments involving caffeine because of the strong effect of caffeine on fluorescence of fura 2 [2]. Caffeine was shown to efficiently inhibit  $InsP_3$ -induced  $Ca^{2+}$  responses in pancreatic acinar cells [3] as well as responses to  $InsP_3$ -producing secretagogues [2]. (A) Example trace illustrates an experiment designed to test the effect of caffeine using the double pulse protocol (for details of the procedure see Figure 6 and the accompanying text in the main paper). Acinar cells were placed in nominally  $Ca^{2+}$ -free extracellular solution and internal  $Ca^{2+}$  stores were depleted by the addition of  $2 \mu M$  TG to the bath. Following store depletion two calcium pulses ( $2 mM$ ) were applied to measure the effect of caffeine on store operated  $Ca^{2+}$  entry. The curves were differentiated and the maximal derivative attained during external  $Ca^{2+}$  pulses determined. (B) SOCE rate (averaged and normalized maximal derivative) in control conditions (white bar) and in the presence of caffeine (black bar). Caffeine had no statistically significant effect on the maximal SOCE rate (probed using Student's *t*-test).
